# Supplementary material for: Preparation and Characterization of Tilapia Collagen-Thermoplastic Polyurethane Composite Nanofiber Membranes
Source: MDPI journal article supplement (doi:10.3390/md20070437), 2022-06-30
Supplement: s1 [file s1]

## Supplementary Materials

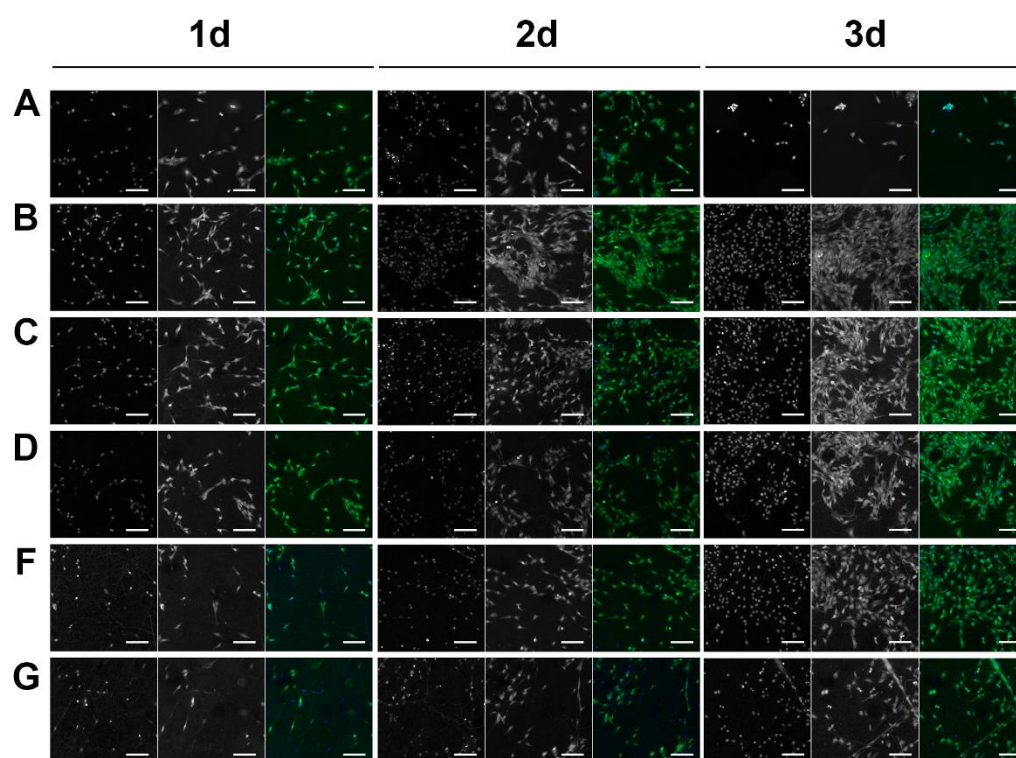

**Figure S1.** HCA scan of Col-TPU composite nanofiber membranes, scale bar is 150  $\mu\text{m}$ .

**Table S1.** Comparison of Col-TPU composite nanofiber membranes different spectral peak positions in FTIR spectra.

| Absorption peaks ( $\text{cm}^{-1}$ ) | Col100 | Col195            | Col190            | Col180            | Col160            | TPU  |
|---------------------------------------|--------|-------------------|-------------------|-------------------|-------------------|------|
| Around 3315 (Amide A)                 | 3311   | 3307              | 3307              | 3307              | 3309              | -    |
| N-H (TPU)                             | -      | 3306 $\uparrow$   | 3307 $\uparrow$   | 3307 $\uparrow$   | 3308 $\uparrow$   | 3330 |
| 2920-2944 (Amide B)                   | 2932   | 2932 $\uparrow$   | 2933 $\uparrow$   | 2936 $\uparrow$   | 2939 $\uparrow$   | -    |
| C-H (TPU)                             | -      | -                 | -                 | -                 | -                 | 2942 |
| 1625-1690 (Amide I)                   | 1655   | 1655              | 1654              | 1654              | 1654              | -    |
| C=C (TPU)                             | -      | 1538 $\downarrow$ | 1537 $\downarrow$ | 1535 $\downarrow$ | 1534 $\downarrow$ | 1532 |
| 1500-1600 (Amide II)                  | 1538   | 1538              | 1537              | 1535              | 1534              | -    |
| $\text{CH}_2$ (TPU)                   | -      | 1452 $\downarrow$ | 1451 $\downarrow$ | 1450 $\downarrow$ | 1449 $\downarrow$ | 1447 |
| 1200-1300 (Amide III)                 | 1223   | 1226              | 1231              | 1228              | 1227              | -    |
| -NHCOO-                               | -      | -                 | -                 | -                 | -                 | 1240 |
| C-O-C (TPU)                           | -      | 1000 $\uparrow$   | 1101 $\uparrow$   | 1107 $\uparrow$   | 1108 $\uparrow$   | 1100 |

**Table S2.** The thermogravimetric analysis of Col-TPU composite nanofiber membranes.

| Samples | T <sub>5%</sub> , °C | T <sub>p</sub> , °C | T <sub>p</sub> weight loss, % | T <sub>50%</sub> , °C | Decomposition of TPU, °C | Residue at 600 °C |
|---------|----------------------|---------------------|-------------------------------|-----------------------|--------------------------|-------------------|
| Col100  | 65.0                 | 314.0               | 54.81                         | 327.0                 | -                        | 14.39             |
| Col95   | 57.7                 | 319.0               | 56.29                         | 331.0                 | 400.3                    | 15.34             |
| Col90   | 64.3                 | 320.5               | 62.26                         | 343.6                 | 413.8                    | 16.32             |
| Col80   | 68.3                 | 320.7               | 62.70                         | 350.3                 | 419.7                    | 18.57             |
| Col60   | 75.7                 | 321.8               | 65.68                         | 357.0                 | 421.5                    | 19.67             |

**Table S3.** CCK-8 assay OD<sub>450</sub> of Col-TPU composite nanofiber membranes. The sequence of letters a-d represents the size of the mean value (a>b>c>d). The same letter indicates no statistically significant difference (P<0.05, n=4).

| Samples | 1d                  | 2d                | 3d                |
|---------|---------------------|-------------------|-------------------|
| Control | 0.18 <sup>abc</sup> | 0.36 <sup>b</sup> | 0.56 <sup>c</sup> |
| Col100  | 0.19 <sup>a</sup>   | 0.78 <sup>a</sup> | 1.76 <sup>a</sup> |
| Col95   | 0.18 <sup>ab</sup>  | 0.40 <sup>b</sup> | 1.11 <sup>b</sup> |
| Col90   | 0.17 <sup>abc</sup> | 0.35 <sup>b</sup> | 1.00 <sup>b</sup> |
| Col80   | 0.15 <sup>cd</sup>  | 0.34 <sup>b</sup> | 0.97 <sup>b</sup> |
| Col60   | 0.17 <sup>d</sup>   | 0.32 <sup>b</sup> | 0.93 <sup>b</sup> |

**Table S4.** Cell proliferation and cytotoxicity evaluation of Col-TPU composite nanofiber membranes respect to control,% and grade.

| Samples | 1d     |       | 2d     |       | 3d     |       |
|---------|--------|-------|--------|-------|--------|-------|
|         | %      | grade | %      | grade | %      | grade |
| Col100  | 107.04 | 0     | 215.53 | 0     | 312.55 | 0     |
| Col95   | 102.25 | 0     | 110.40 | 0     | 195.93 | 0     |
| Col90   | 97.04  | 0     | 97.43  | 0     | 177.86 | 0     |
| Col80   | 81.97  | I     | 94.24  | 0     | 171.66 | 0     |
| Col60   | 76.80  | I     | 88.21  | 0     | 164.92 | 0     |
